# Supplementary material for: Inferring occluded projectile motion changes connectivity within a visuo-fronto-parietal network
Source: PubMed Central journal article supplement (PMC11374914; doi:10.1007/s00429-024-02815-2), 2024-06-25
Supplement: 429_2024_2815_MOESM1_ESM.pdf [file 429_2024_2815_MOESM1_ESM.pdf]

## Supplementary information

| cluster | # voxels | region                               | pFWEcorr. | peak coordinate |     |    |         |
|---------|----------|--------------------------------------|-----------|-----------------|-----|----|---------|
|         |          |                                      |           | x               | y   | z  | z score |
| 1       | 1434     | Supplementary motor area             | 0         | -2              | -2  | 60 | 4.99    |
| 2       | 387      | Superior parietal lobule             | 0         | 20              | -70 | 50 | 5.27    |
| 3       | 356      | V2                                   | 0         | -4              | -94 | 16 | 4.23    |
| 4       | 351      | Superior parietal lobule             | 0         | -20             | -70 | 60 | 4.19    |
| 5       | 242      | Supramarginal gyrus                  | 0         | 56              | -36 | 52 | 4.32    |
| 6       | 189      | Premotor cortex/Middle frontal gyrus | 0.001     | 30              | 0   | 52 | 4.79    |
| 7       | 96       | Premotor cortex                      | 0.029     | -56             | -4  | 44 | 3.83    |
| 8       | 95       | V2                                   | 0.03      | 10              | -96 | 16 | 4.26    |

**Table S1.** Activation clusters and corresponding size, anatomical region, FWE-corrected p-value, peak coordinate in MNI space, and maximum z-score of the functional connectivity analysis map, thresholded at  $Z > 3.1$  and FWE-corrected using a cluster significance level of  $p < .05$ . Reported anatomical labels were determined using the Jülich Histological (Eickhoff et al., 2007) and Harvard-Oxford cortical structural (Desikan et al., 2006) atlases, and correspond to the location of maxima within each cluster.

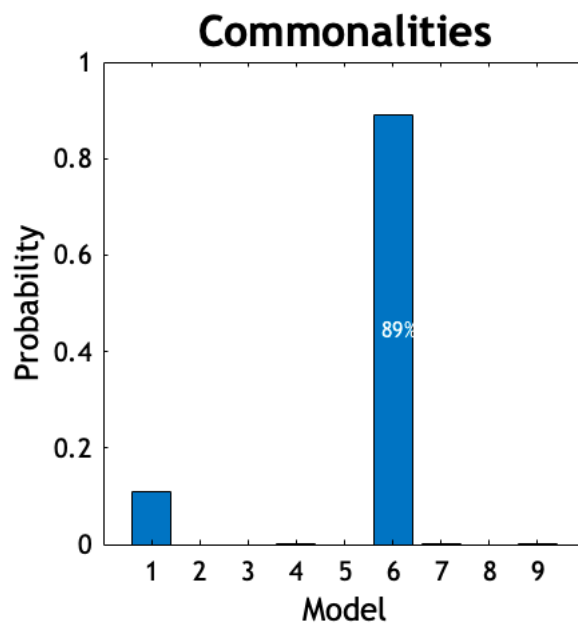

**Figure S1.** Results of the comparison of the 9 pre-defined PEB models, showing the posterior probability for the commonalities across subjects.

| <b>Connection</b> | <b>Effect of physical inference</b> |
|-------------------|-------------------------------------|
| SPL to visual     | 0.725                               |
| SPL to SMG        | 1.263                               |
| SPL to PMd        | 0.473                               |
| SPL to SMA        | 1.107                               |
| SMG to SPL        | -1.558                              |
| SMG to PMd        | -1.180                              |
| PMd to SMG        | 0.601                               |
| PMd to SMA        | 1.034                               |
| SMA to SPL        | 0.6                                 |
| SMA to SMG        | -0.584                              |
| SMA to PMd        | 0.93                                |

**Table S2.** Estimated group-level connection strength with units in Hertz (Hz), representing the changes in effective connectivity due to task-related modulatory input, averaged over PEB models. Abbreviations: SPL = superior parietal lobule; SMG = supramarginal gyrus; PMd = dorsal premotor cortex; SMA = supplementary motor areas.
